# Supplementary material for: The beneficial effects of cumulus cells and oocyte-cumulus cell gap junctions depends on oocyte maturation and fertilization methods in mice
Source: PeerJ. 2016 Mar 3;4:e1761. doi: 10.7717/peerj.1761 (PMC4782716; doi:10.7717/peerj.1761)
Supplement: Data S1 — Table S1 raw data. The role of cumulus cells and their gap junctions in oocyte maturation (n = 3). Table S2 raw data. Fertilization based on the number of GV oocytes (n = 3). Table S3 raw data. Fertilization based on the number of MII oocytes (n = 3). Table S4 raw data. Embryonic development based on the number of GV oocytes (n = 3). Table S5 raw data. Embryonic development based on the number of MII oocytes (n = 3). Table S6 raw data. Embryonic development based on number of 2-cell embryos (n = 3). [file peerj-04-1761-s001.xlsx]

## Sheet: Table S1 oocyte maturation
Table S1. The role of cumulus cells and their gap junctions in oocyte maturation (n=3).
Maturation	Abbreviation	PB1% (n/N)
		Repeat 1	Repeat 2	Repeat 3	mean ± SD
In vivo OCC	M-vivo-OCC	99.01 (100/101)	98.77 (160/162)	98.57 (138/140)	98.78 ± 0.22
In vitro OCC	M-vitro-OCC	97.45 (191/196)	98.21 (110/112)	97.06 (99/102)	97.57 ± 0.59
In vitro DO + cumulus	M-vitro-DC	83.82 (57/68)	83.97 (131/156)	90.91 (100/110)	86.23 ± 4.05
In vitro DO	M-vitro-DO	84.21 (96/114)	74.17 (112/151)	86.29 (151/175)	81.56 ± 6.48

## Sheet: Table S2 fertilization GV
Table S2. Fertilization based on the number of GV oocytes (n=3).
Maturation	Insemination	Abbreviation	2-cell% (n/N)
			Repeat 1	Repeat 2	Repeat 3	mean ± SD
In vivo OCC	OCC	M-vivo-OCC + I-OCC	91.97 (275/299)	89.93 (125/139)	93.15 (136/146)	91.68 ± 1.63
	DO + cumulus	M-vivo-OCC + I-DC	79.38 (331/417)	79.25 (42/53)	83.33 (65/78)	80.65 ± 2.32
	DO	M-vivo-OCC + I-DO	65.40 (155/237)	65.91 (87/132)	61.70 (58/94)	64.34 ± 2.30
In vitro OCC	OCC	M-vitro-OCC + I-OCC	54.34 (144/265)	60.28 (85/141)	44.44 (56/126)	53.02 ± 8.00
	DO + cumulus	M-vitro-OCC + I-DC	55.00 (33/60)	58.00 (29/50)	54.17 (26/48)	55.72 ± 2.71
	DO	M-vitro-OCC + I-DO	39.06 (50/128)	48.07 (112/233)	49.73 (93/187)	45.62 ± 5.74
In vitro DO + cumulus	DO + cumulus	M-vitro-DC + I-DC	43.72 (80/183)	42.54 (77/181)	53.59 (82/153)	46.62 ± 6.07
	DO	M-vitro-DC + I-DO	38.05 (43/113)	34.52 (58/168)	39.34 (96/244)	37.30 ± 2.50
In vitro DO	DO + cumulus	M-vitro-DO + I-DC	52.10 (62/119)	43.41 (89/205)	45.93 (113/246)	47.15 ± 4.47
	DO	M-vitro-DO + I-DO	30.84 (70/227)	39.52 (66/167)	40.43 (38/94)	36.93 ± 5.29

## Sheet: Table S3 fertilization MII
Table S3. Fertilization based on the number of MII oocytes (total MII oocytes) (n=3).
Maturation	Insemination	Abbreviation	2-cell% (n/N)
			Repeat 1	Repeat 2	Repeat 3	mean ± SD
In vivo OCC	OCC	M-vivo-OCC + I-OCC	92.91 (275/296)	91.24 (125/137)	94.44 (136/144)	92.86 ± 1.60
	DO + cumulus	M-vivo-OCC + I-DC	80.93 (331/409)	80.77 (42/52)	84.42 (65/77)	82.04 ± 2.06
	DO	M-vivo-OCC + I-DO	66.81 (155/232)	66.92 (87/130)	62.37 (58/93)	65.37 ± 2.60
In vitro OCC	OCC	M-vitro-OCC + I-OCC	55.81 (144/258)	61.59 (85/138)	45.90 (56/122)	54.43 ± 7.94
	DO + cumulus	M-vitro-OCC + I-DC	56.90 (33/58)	59.18 (29/49)	54.17 (26/48)	56.75 ± 3.55
	DO	M-vitro-OCC + I-DO	40.00 (50/125)	48.07 (112/233)	51.10 (93/182)	46.39 ± 5.74
In vitro DO + cumulus	DO + cumulus	M-vitro-DC + I-DC	52.29 (80/153)	50.66 (77/152)	58.99 (82/139)	53.98 ± 4.42
	DO	M-vitro-DC + I-DO	45.26 (43/95)	38.41 (58/151)	46.83 (96/205)	43.50 ± 4.48
In vitro DO	DO + cumulus	M-vitro-DO + I-DC	62.00 (62/100)	58.55 (89/152)	53.30 (113/212)	57.95 ± 4.38
	DO	M-vitro-DO + I-DO	39.11 (70/179)	46.15 (66/143)	52.05 (38/73)	45.77 ± 6.48

## Sheet: Table S4 embryo GV
Table S4. Embryonic development based on the number of GV oocytes (n=3).
Maturation	Insemination	Abbreviation	4-cell% (n/N)				Morula% (n/N)				Blastocyst% (n/N)
			Repeat 1	Repeat 2	Repeat 3	mean ± SD	Repeat 1	Repeat 2	Repeat 3	mean ± SD	Repeat 1	Repeat 2	Repeat 3	mean ± SD
In vivo OCC	OCC	M-vivo-OCC + I-OCC	73.58(220/299)	82.01(114/139)	81.51(119/146)	79.03 ± 4.73	71.57 (214/299)	76.26 (106/139)	75.34 (110/146)	74.39 ± 2.48	52.17 (156/299)	46.76(65/139)	58.90(86/146)	52.61 ± 6.08
	DO + cumulus	M-vivo-OCC + I-DC	54.20 (226/417)	54.72 (29/53)	78.21 (61/78)	62.38 ±13.71	48.68 (203/417)	45.28 (24/53)	62.82 (49/78)	52.26 ± 9.30	37.65 (157/417)	39.62 (21/53)	30.77 (24/78)	36.01 ± 4.65
	DO	M-vivo-OCC + I-DO	32.49 (77/237)	26.52 (35/132)	23.40 (22/94)	27.47 ± 4.62	29.11 (69/237)	20.45 (27/132)	18.09 (17/94)	22.55 ± 5.81	24.05 (57/237)	14.39 (19/132)	7.45 (7/94)	15.30 ± 8.34
In vitro OCC	OCC	M-vitro-OCC + I-OCC	20.00 (53/265)	20.57 (29/141)	24.60 (31/126)	21.72 ± 2.51	16.60 (44/265)	17.73 (25/141)	17.46 (22/126)	17.26 ± 0.59	7.17 (19/265)	7.09 (10/141)	8.73 (11/126)	7.66 ± 0.92
	DO + cumulus	M-vitro-OCC + I-DC	20.00 (12/60)	16.00 (8/50)	22.92 (11/48)	19.64 ± 4.89	15.00 (9/60)	14.00 (7/50)	16.67 (8/48)	15.22 ± 1.89	13.33 (8/60)	10.00 (5/50)	8.33 (4/48)	10.55 ± 1.18
	DO	M-vitro-OCC + I-DO	14.84 (19/128)	18.88 (44/233)	16.58 (31/187)	16.77 ± 2.03	13.28 (17/128)	15.88 (37/233)	14.97 (28/187)	14.71 ± 1.32	6.25 （8/128）	7.30 (17/233)	10.16 (19/187)	7.90 ± 2.02
In vitro DO + cumulus	DO + cumulus	M-vitro-DC + I-DC	15.85 (29/183)	19.89 (36/181)	18.30 (28/153)	18.01 ± 2.04	12.57 (23/183)	18.23 (33/181)	12.42 (19/153)	14.41 ± 3.31	5.46 (10/183)	9.94 (18/181)	3.27 (5/153)	6.22 ± 3.40
	DO	M-vitro-DC + I-DO	20.35 (23/113)	19.05 (32/168)	17.21 (42/244)	18.87 ± 1.58	14.16 (16/113)	16.07 (27/168)	13.11 (32/244)	14.45 ± 1.50	8.85 (10/113)	7.14 (12/168)	8.61 (21/244)	8.20 ± 0.92
In vitro DO	DO + cumulus	M-vitro-DO + I-DC	17.65 (21/119)	15.12 (31/205)	18.70 (46/246)	17.16 ± 1.84	10.08 (12/119)	12.20 (25/205)	13.82 (34/246)	12.03 ± 1.87	5.04 (6/119)	6.34 (13/205)	6.10 (15/246)	5.83 ± 0.69
	DO	M-vitro-DO + I-DO	11.89 (27/227)	13.17 (22/167)	10.64 (10/94)	11.90 ± 1.27	11.01 (25/227)	9.58 (16/167)	10.64 (10/94)	10.41 ± 0.74	6.61 (15/227)	5.99 (10/167)	5.32 (5/94)	5.97 ± 0.64

## Sheet: Table S5 embryo MII
Table S5. Embryonic development based on the number of MII oocytes (n=3).
Maturation	Insemination	Abbreviation	4-cell% (n/N)				Morula% (n/N)				Blastocyst% (n/N)
			Repeat 1	Repeat 2	Repeat 3	mean ± SD	Repeat 1	Repeat 2	Repeat 3	mean ± SD	Repeat 1	Repeat 2	Repeat 3	mean ± SD
In vivo OCC	OCC	M-vivo-OCC + I-OCC	74.32 (220/296)	83.21 (114/137)	82.64 (119/144)	80.06 ± 4.97	72.30 (214/296)	77.37 (106/137)	76.39 (110/144)	75.35 ± 2.69	52.70 (156/296)	47.45 (65/137)	59.72 (86/144)	53.29 ± 6.16
	DO + cumulus	M-vivo-OCC + I-DC	55.26 (226/409)	55.77 (29/52)	79.22 (61/77)	63.42 ± 13.69	49.63 (203/409)	46.15 (24/52)	63.64 (49/77)	53.14 ± 9.25	38.39 (157/409)	40.38 (21/52)	31.17 (24/77)	36.65 ± 4.85
	DO	M-vivo-OCC + I-DO	33.19 (77/232)	26.92 (35/130)	23.66 (22/93)	27.92 ± 4.84	29.74 (69/232)	20.77 (27/130)	18.28 (17/93)	22.93 ± 6.03	24.57 (57/232)	14.62 (19/130)	7.53 (7/93)	15.57 ± 8.56
In vitro OCC	OCC	M-vitro-OCC + I-OCC	20.54 (53/258)	21.01 (29/138)	25.41 (31/122)	22.32 ± 2.68	17.05 (44/258)	18.12 (25/138)	18.03 (22/122)	17.73 ± 0.59	7.36 (19/258)	7.25 (10/138)	9.02 (11/122)	7.88 ± 0.99
	DO + cumulus	M-vitro-OCC + I-DC	20.69 (12/58)	16.33 (8/49)	22.92 (11/48)	19.98 ± 3.35	15.52 (9/58)	14.29 (7/49)	16.67 (8/48)	15.49 ± 1.19	13.79 (8/58)	10.20 (5/49)	8.33 (4/48)	10.77 ± 2.77
	DO	M-vitro-OCC + I-DO	15.20 (19/125)	18.88 (44/233)	17.03 (31/182)	17.04 ± 1.84	13.60 (17/125)	15.88 (37/233)	15.38 (28/182)	14.95 ± 1.20	6.40 (8/125)	7.30 (17/233)	10.44 (19/182)	8.05 ± 2.12
In vitro DO + cumulus	DO + cumulus	M-vitro-DC + I-DC	18.95 (29/153)	23.68 (36/152)	20.14 (28/139)	20.93 ± 2.46	15.03 (23/153)	21.71 (33/152)	13.67 (19/139)	16.80 ± 4.30	6.54 (10/153)	11.84 (18/152)	3.60 (5/139)	7.33 ± 4.18
	DO	M-vitro-DC + I-DO	24.21 (23/95)	21.19 (32/151)	20.49 (42/205)	21.96 ± 1.98	16.84 (16/95)	17.88 (27/151)	15.61 (32/205)	16.78 ± 1.14	10.53 (10/95)	7.95 (12/151)	10.24 (21/205)	9.57 ± 1.41
In vitro DO	DO + cumulus	M-vitro-DO + I-DC	21.00 (21/100)	20.39 (31/152)	21.70 (46/212)	21.03 ± 0.65	12.00 (12/100)	16.45 (25/152)	16.04 (34/212)	14.83 ± 2.46	6.00 (6/100)	8.55 (13/152)	7.08 (15/212)	7.21 ± 1.28
	DO	M-vitro-DO + I-DO	15.08 (27/179)	15.38 (22/143)	13.70 (10/73)	14.72 ± 0.90	13.97 (25/179)	11.19 (16/143)	13.70 (10/73)	12.95 ± 1.53	8.38 (15/179)	6.99 (10/143)	6.85 (5/73)	7.41 ± 0.85

## Sheet: Table S6 embryo 2-cell
Table S6. Embryonic development based on number of 2-cell embryos (n=3).
Maturation	Insemination	Abbreviation	4-cell% (n/N)				Morula% (n/N)				Blastocyst% (n/N)
			Repeat 1	Repeat 2	Repeat 3	mean ± SD	Repeat 1	Repeat 2	Repeat 3	mean ± SD	Repeat 1	Repeat 2	Repeat 3	mean ± SD
In vivo OCC	OCC	M-vivo-OCC + I-OCC	80.00 (220/275)	91.20 (114/125)	87.50 (119/136)	86.23 ± 5.71	77.82 (214/275)	84.80 (106/125)	80.88 (110/136)	86.23 ± 5.71	56.73 (156/275)	52.00 (65/125)	63.24 (86/136)	57.32 ± 5.64
	DO + cumulus	M-vivo-OCC + I-DC	68.28 (226/331)	69.05 (29/42)	93.85 (61/65)	77.06 ± 14.54	61.33 (203/331)	57.14 (24/42)	75.38 (49/65)	64.62 ± 9.56	47.43 (157/331)	50.00 (21/42)	36.92 (24/65)	44.78 ± 6.93
	DO	M-vivo-OCC + I-DO	49.68 (77/155)	40.23 (35/87)	37.93 (22/58)	42.61 ± 6.23	44.52 (69/155)	31.03 (27/87)	29.31 (17/58)	34.95 ± 8.33	36.77 (57/155)	21.84 (19/87)	12.07 (7/58)	23.56 ± 12.44
In vitro OCC	OCC	M-vitro-OCC + I-OCC	36.81 (53/144)	34.12 (29/85)	55.36 (31/56)	42.10 ± 11.57	30.56 (44/144)	29.41 (25/85)	39.29 (22/56)	33.09 ± 5.40	13.19 (19/144)	11.76 (10/85)	19.64 (11/56)	14.86 ± 4.20
	DO + cumulus	M-vitro-OCC + I-DC	36.36 (12/33)	27.59 (8/29)	42.31 (11/26)	35.42 ± 7.41	27.27 (9/33)	24.14 (7/29)	30.77 (8/26)	27.39 ± 3.32	24.24 (8/33)	17.24 (5/29)	15.38 (4/26)	18.95 ± 4.67
	DO	M-vitro-OCC + I-DO	38.00 (19/50)	39.29 (44/112)	33.33 (31/93)	36.87 ± 3.13	34.00 (17/50)	33.04 (37/112)	30.11 (28/93)	32.38 ± 2.03	16.00 (8/50)	15.18 (17/112)	20.43 (19/93)	17.20 ± 2.82
In vitro DO + cumulus	DO + cumulus	M-vitro-DC + I-DC	36.25 (29/80)	46.75 (36/77)	34.15 (28/82)	39.05 ± 6.75	28.75 (23/80)	42.86 (33/77)	23.17 (19/82)	31.59 ± 10.15	12.50 (10/80)	23.38 (18/77)	6.10 (5/82)	13.99 ± 8.74
	DO	M-vitro-DC + I-DO	53.49 (23/43)	55.17 (32/58)	43.75 (42/96)	50.80 ± 6.17	37.21 (16/43)	46.55 (27/58)	33.33 (32/96)	39.03 ± 6.79	23.26 (10/43)	20.69 (12/58)	21.88 (21/96)	21.94 ± 1.28
In vitro DO	DO + cumulus	M-vitro-DO + I-DC	33.87 (21/62)	34.83 (31/89)	40.71 (46/113)	36.47 ± 3.70	19.35 (12/62)	28.09 (25/89)	30.09 (34/113)	25.84 ± 5.71	9.68 (6/62)	14.61 (13/89)	13.27 (15/113)	12.52 ± 2.55
	DO	M-vitro-DO + I-DO	38.57 (27/70)	33.33 (22/66)	26.32 (10/38)	32.74 ± 6.15	35.71 (25/70)	24.24 (16/66)	26.32 (10/38)	28.76 ± 6.11	21.43 (15/70)	15.15 (10/66)	13.16 (5/38)	16.58 ± 4.32
